# Supplementary material for: Synthesis and biological evaluation of novel all-hydrocarbon cross-linked aza-stapled peptides
Source: Royal Society of Chemistry journal article supplement (doi:10.1039/d2ob01496c), 2022-01-01
Supplement: d2ob01496c1.pdf [file d2ob01496c1.pdf]

## Supporting Information

### Synthesis of Novel All-hydrocarbon Cross-linked Diazacyclopeptides

Zhihong Luo,<sup>†a</sup> Lei Xu,<sup>†a</sup> Xiaomin Tang,<sup>†a</sup> Xuejun Zhao, Tong He,<sup>a</sup> William D. Lubell,<sup>\*b</sup>

Jinqiang Zhang<sup>\*a,c</sup>

<sup>a</sup> School of Pharmaceutical Sciences, Chongqing University, Chongqing 401331, P. R. China

<sup>b</sup> Département de Chimie, Université de Montréal, C.P. 6128, Succursale Centre-Ville, Montréal, Québec H3C 3J7, Canada

<sup>c</sup> Chongqing University Industrial Technology Research Institute, Chongqing 401329, People's Republic of China

#### Table of contents

|   |                                                     |     |
|---|-----------------------------------------------------|-----|
| 1 | <sup>1</sup> H-NMR and <sup>13</sup> C-NMR spectrum | P2  |
| 2 | Analytical HPLC chromatograms of purified peptides  | P10 |

# 1. <sup>1</sup>H-NMR and <sup>13</sup>C-NMR spectrum

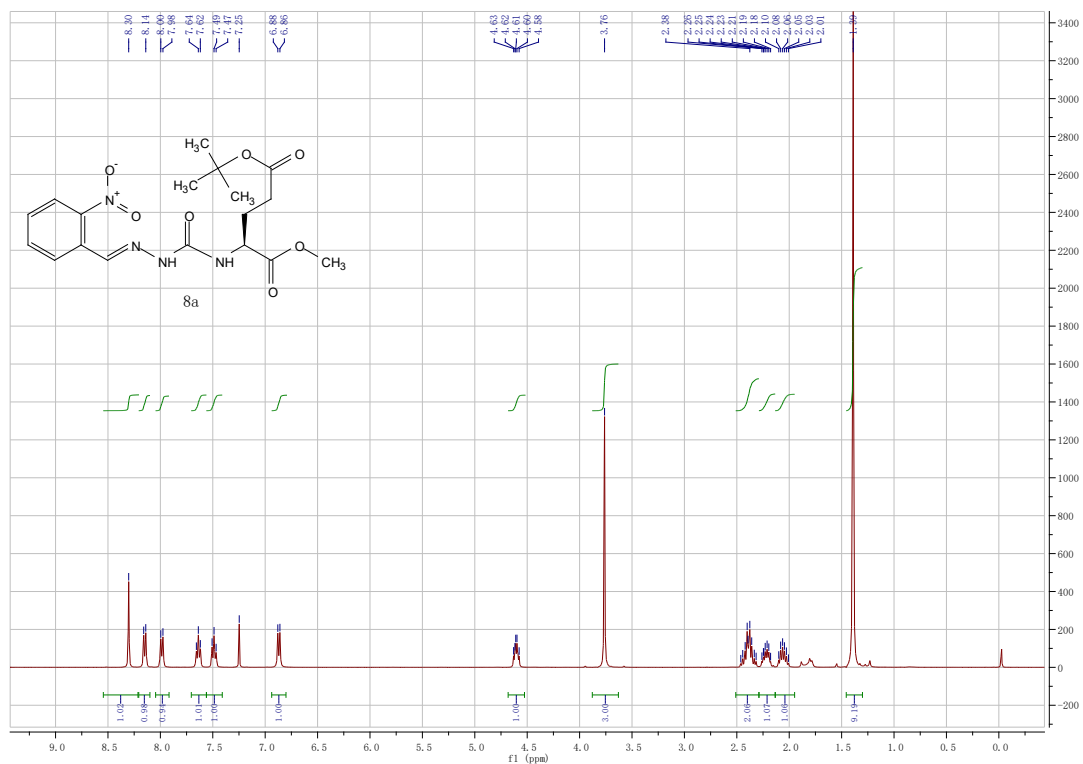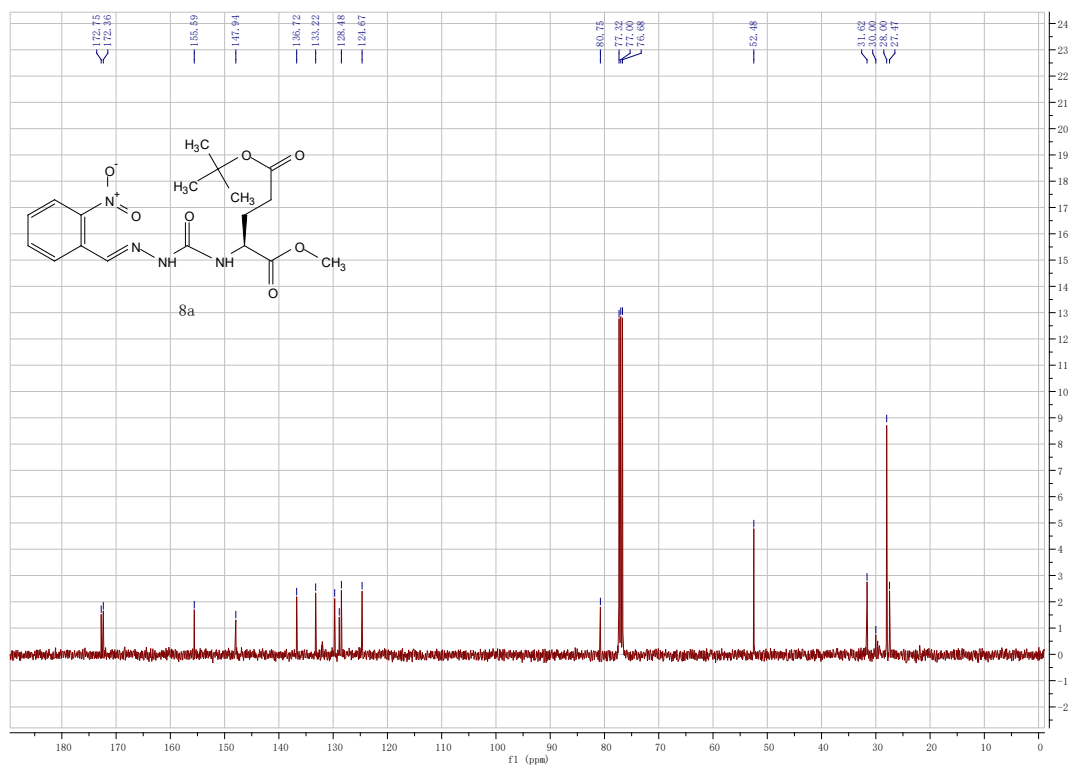

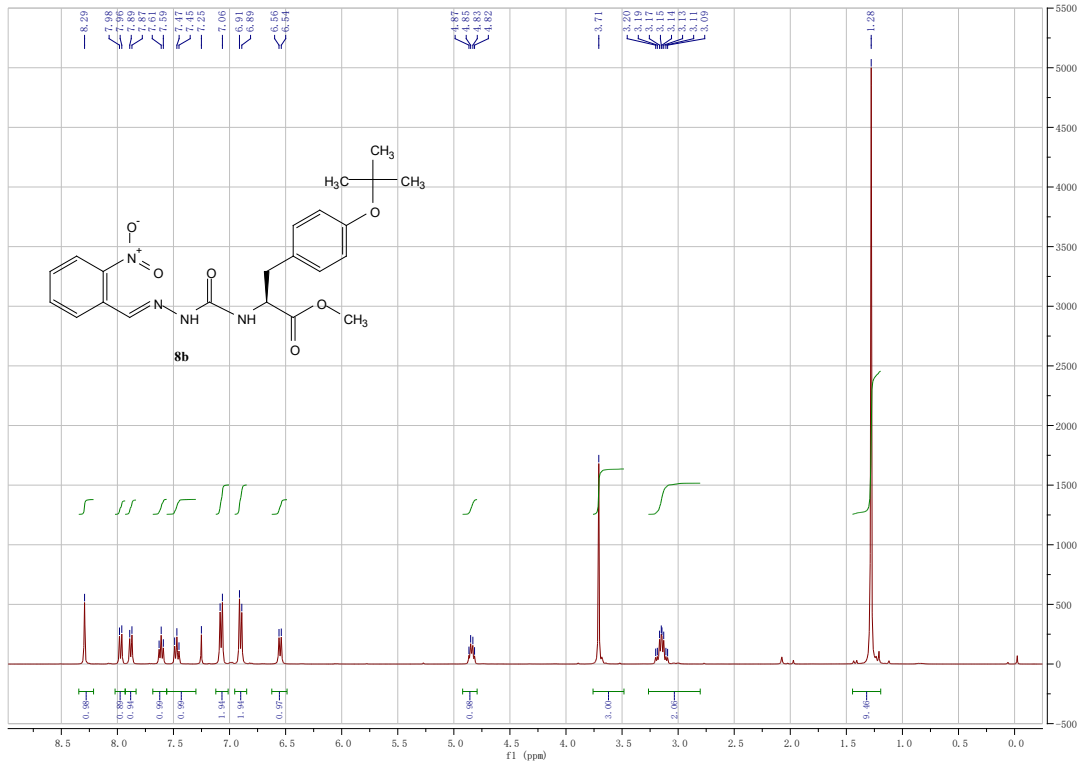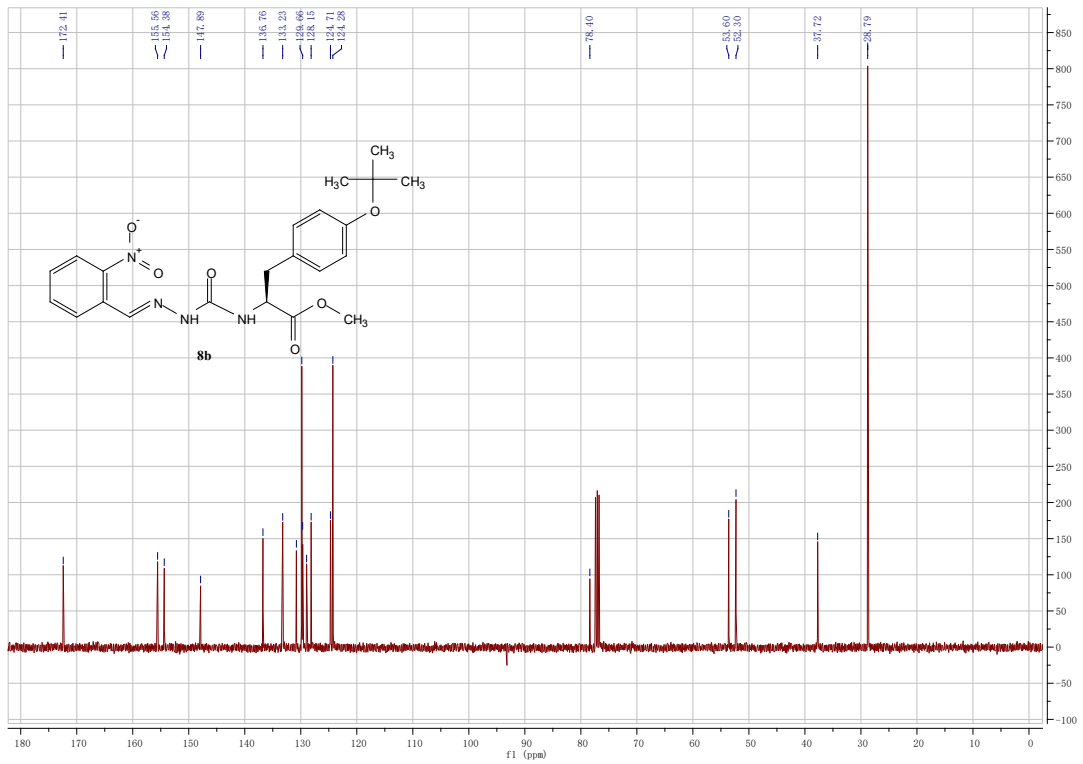



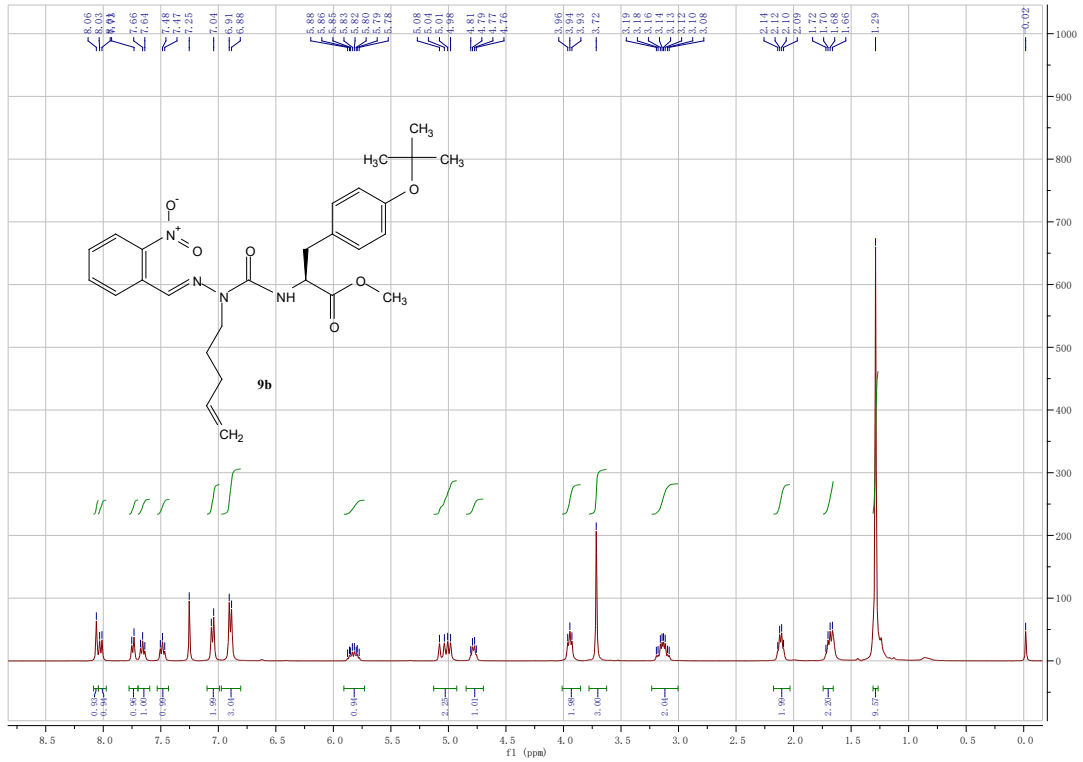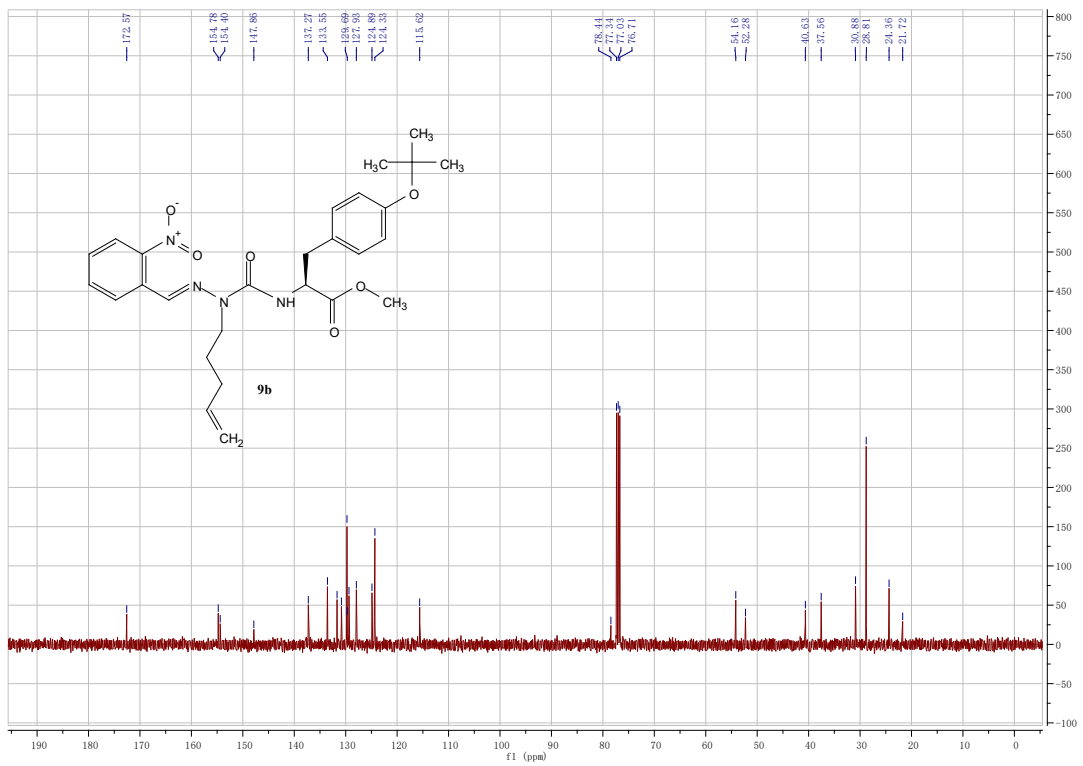



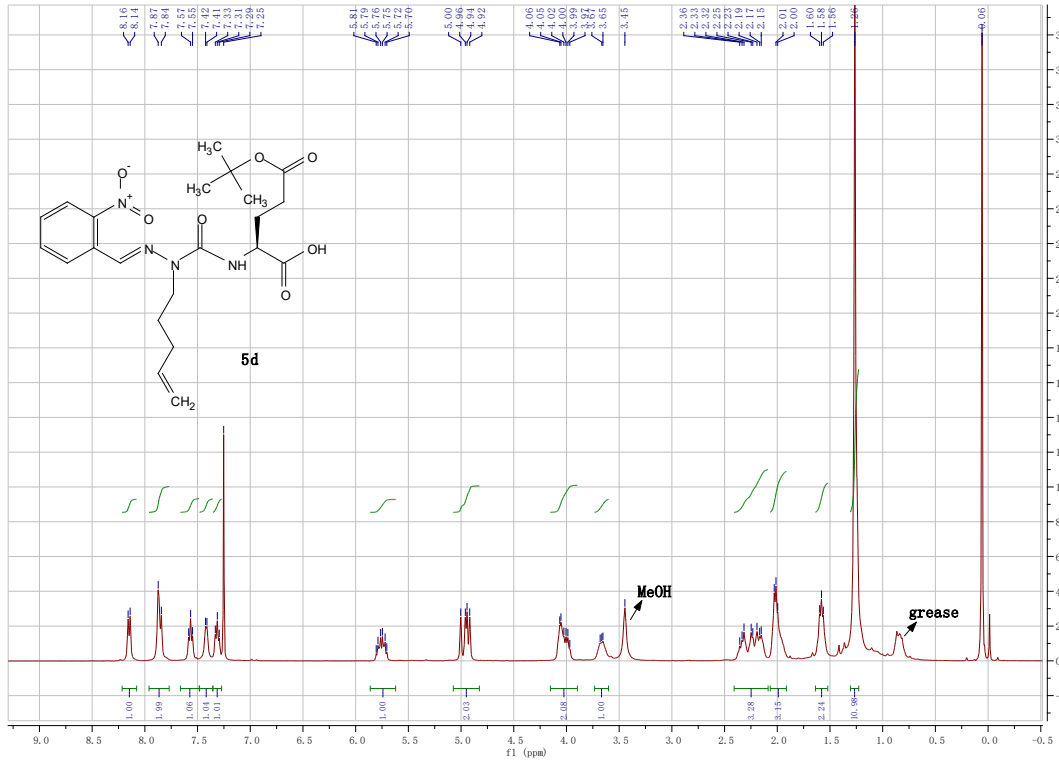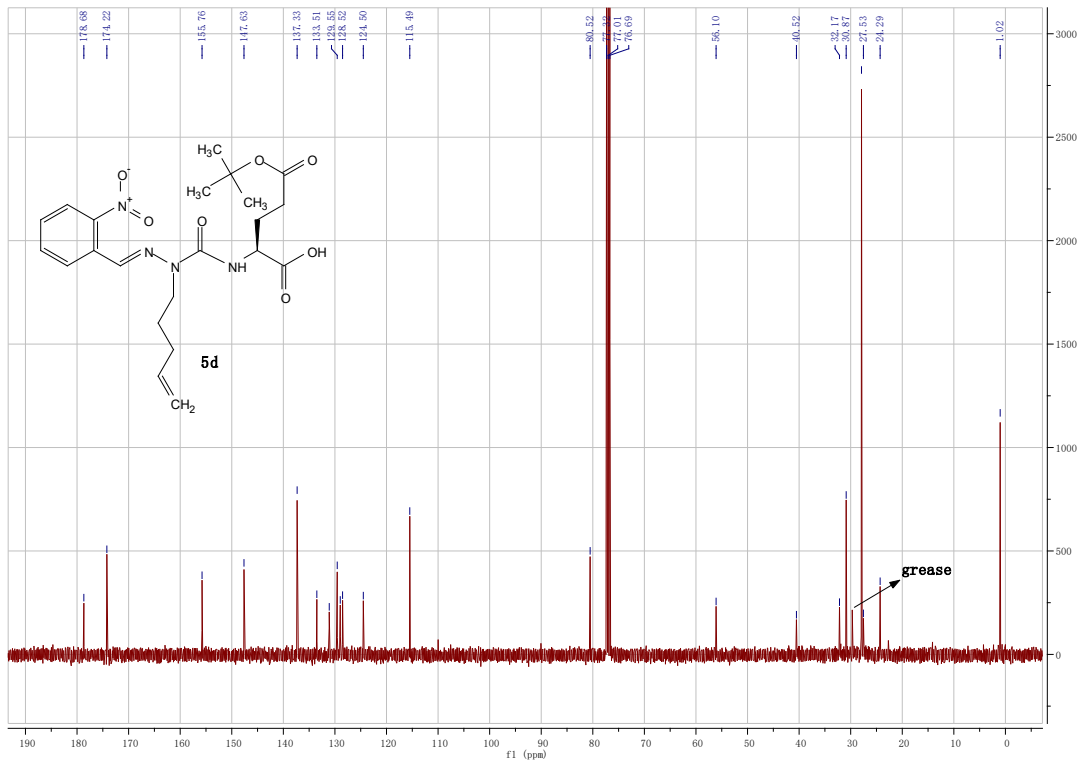

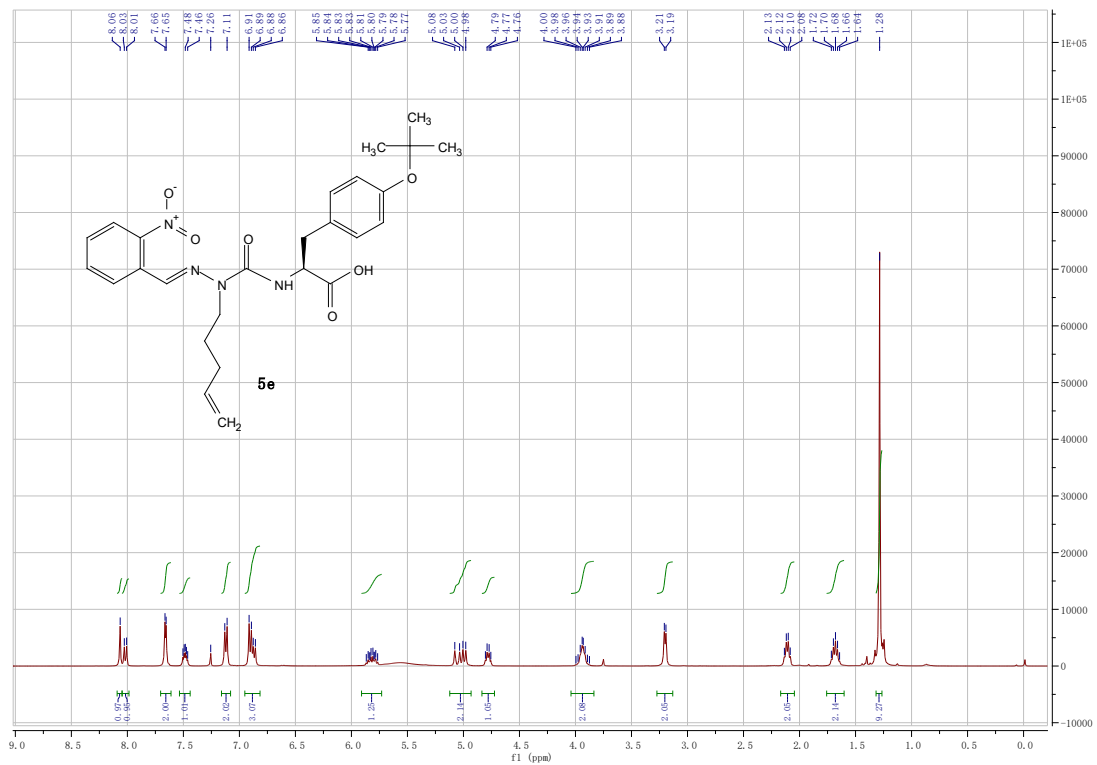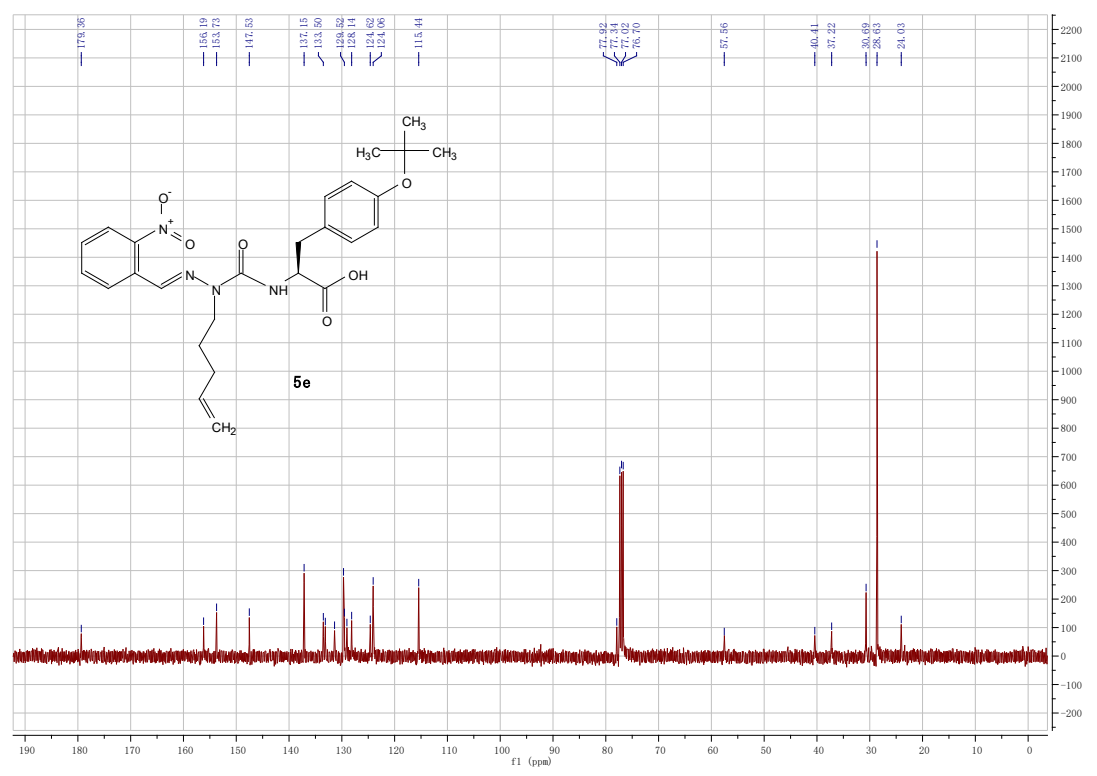



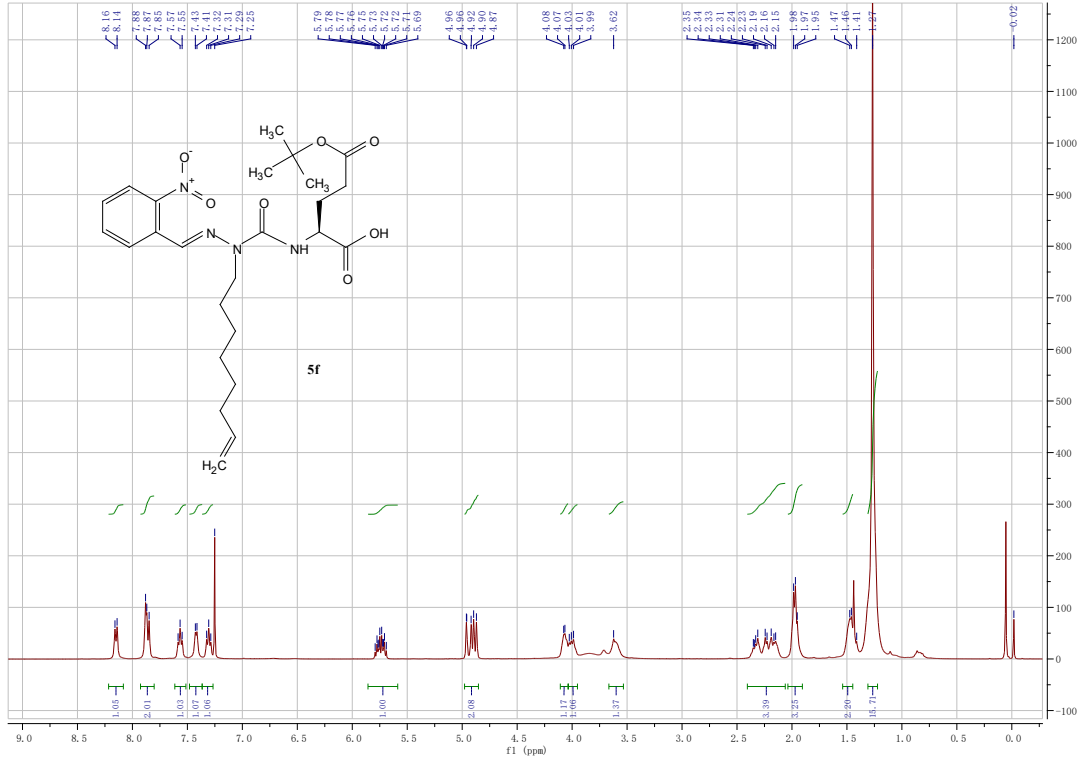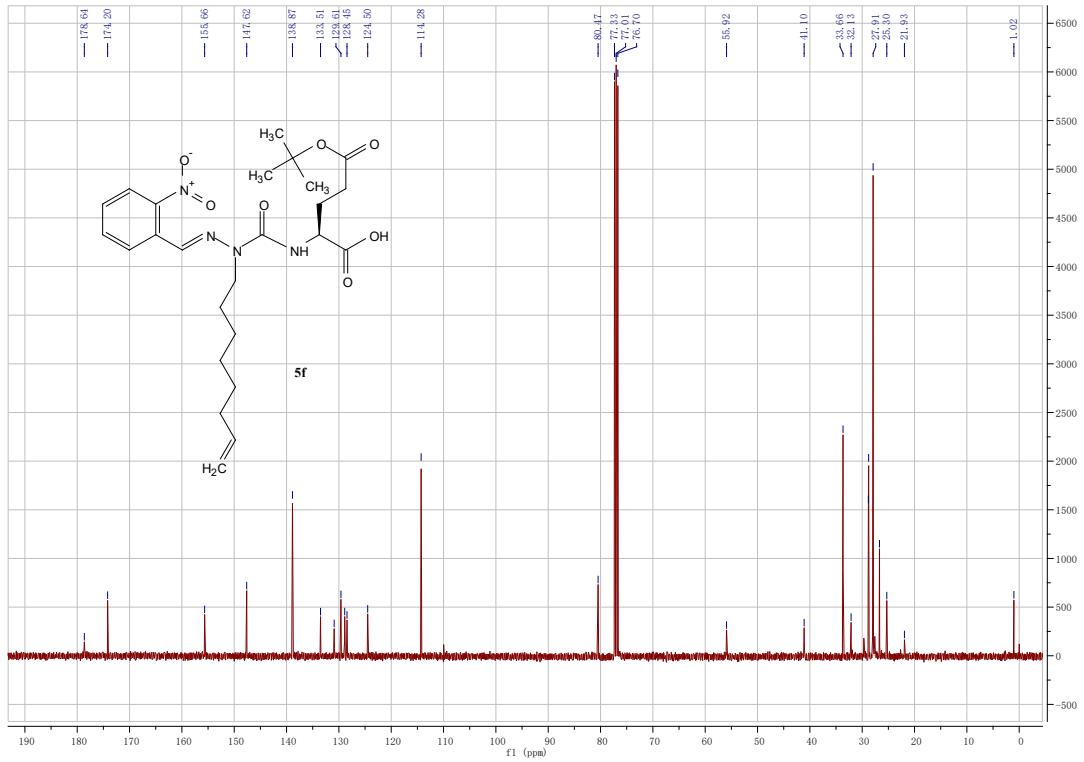

## 2. Analytical HPLC chromatograms of purified peptides.

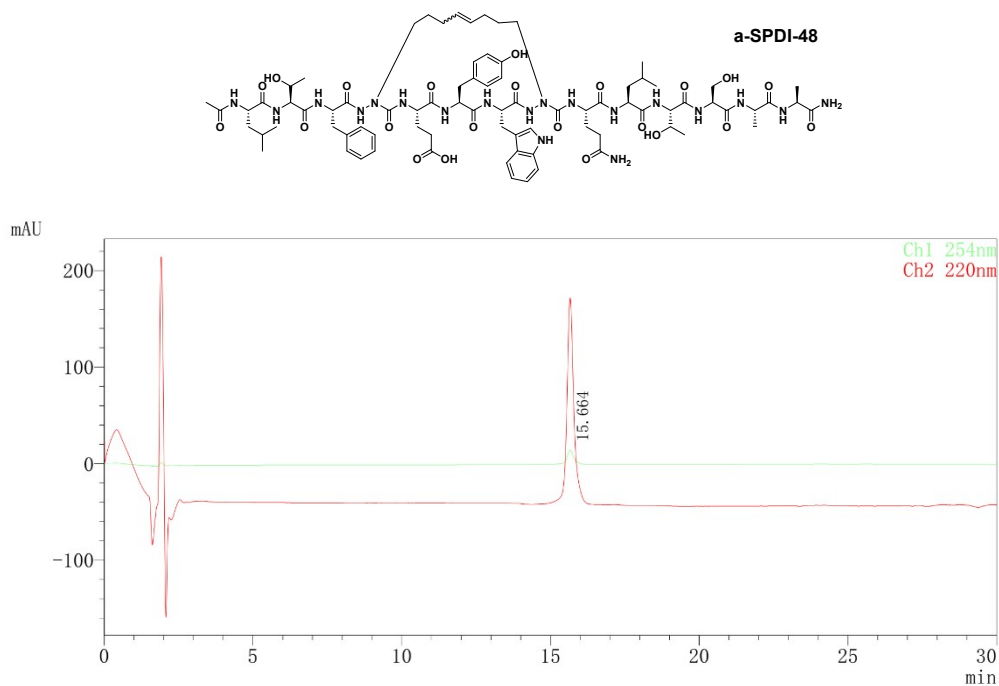

**Figure S1.** HPLC analysis of the aza-stapled peptide **a-SPDI-48** was performed using an isocratic gradient of 70% for 5 min, and then using a linear gradient of 70-95% of MeOH containing 0.1% FA in H<sub>2</sub>O containing 0.1% FA over 15 min, R.T. = 15.664 min; HRMS m/z calcd for C<sub>80</sub>H<sub>115</sub>N<sub>19</sub>NaO<sub>22</sub> [M+Na]<sup>+</sup> 1716.83563, found 1716.83598.

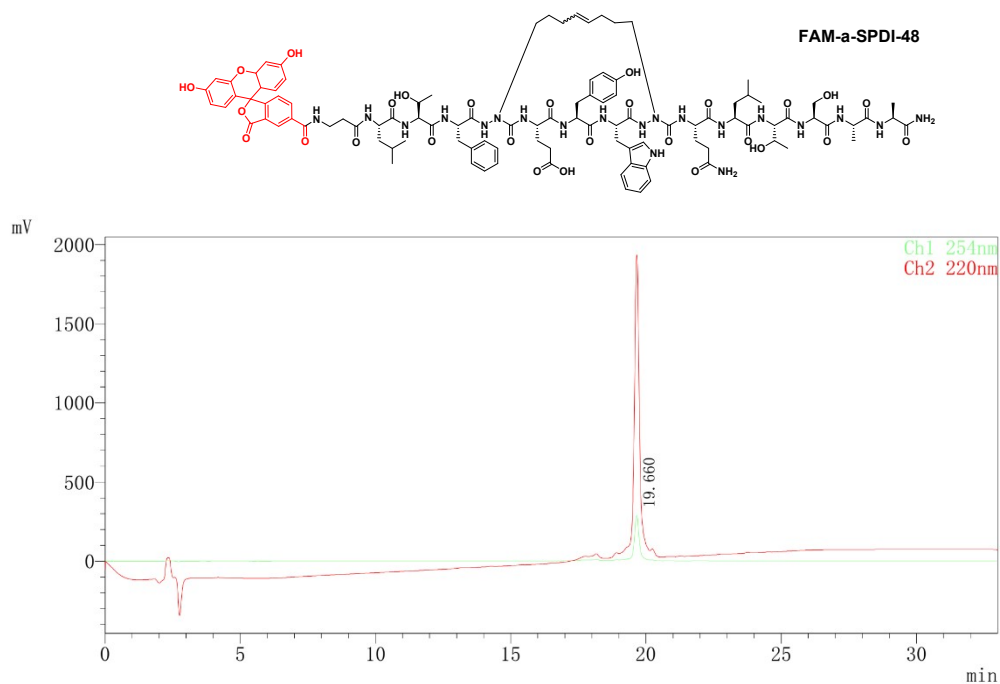

**Figure S2.** HPLC analysis of the aza-stapled peptide **FAM-a-SPDI-48** was performed using a linear gradient of 70-95% of MeOH containing 0.1% FA in H<sub>2</sub>O containing 0.1% FA over 20 min, R.T. = 19.660 min; HRMS m/z calcd for C<sub>102</sub>H<sub>129</sub>N<sub>20</sub>O<sub>28</sub> [M-H]<sup>-</sup> 2081.92797, found 2081.92041.

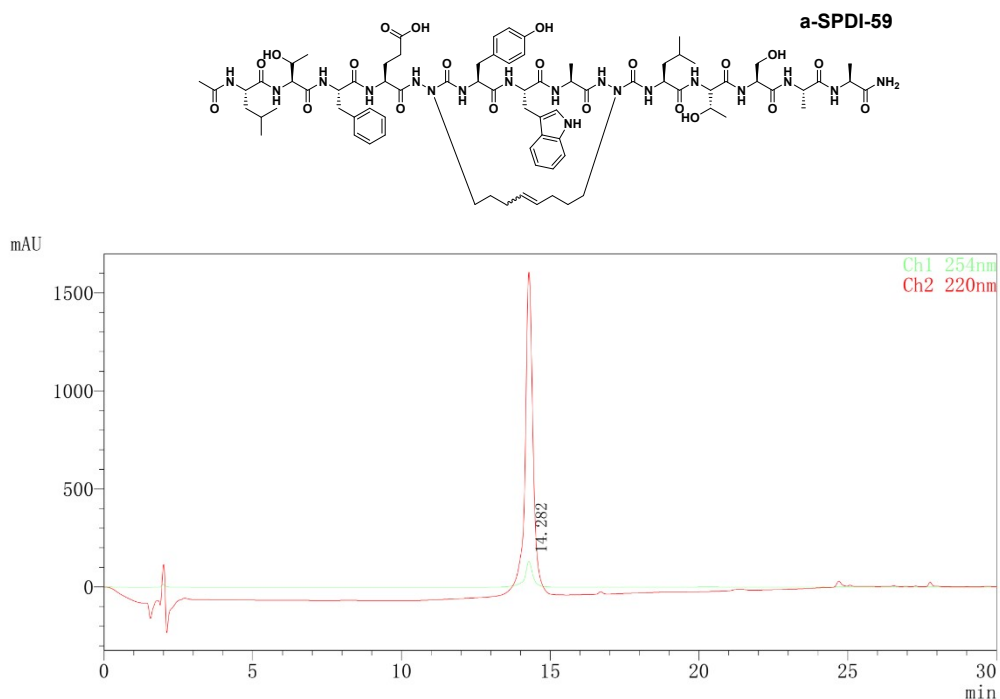

**Figure S3.** HPLC analysis of the aza-stapled peptide **a-SPDI-59** was performed using an isocratic gradient of 65% for 5 min, and then using a linear gradient of 65-95% of MeOH containing 0.1% FA in H<sub>2</sub>O containing 0.1% FA over 15 min, R.T. = 14.282 min; HRMS m/z calcd for C<sub>78</sub>H<sub>112</sub>N<sub>18</sub>NaO<sub>21</sub> [M+Na]<sup>+</sup> 1659.81416, found 1659.81397.

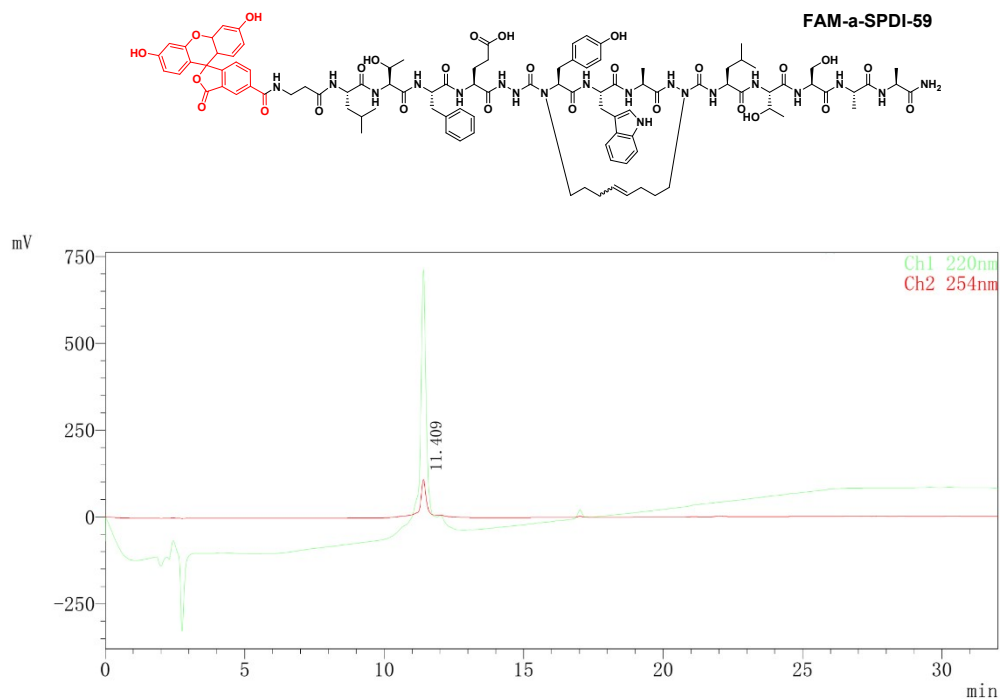

**Figure S4.** HPLC analysis of the aza-stapled peptide **FAM-a-SPDI-59** was performed using a linear gradient of 60-95% of MeOH containing 0.1% FA in H<sub>2</sub>O containing 0.1% FA over 20 min, R.T. = 11.409 min; HRMS m/z calcd for C<sub>100</sub>H<sub>126</sub>N<sub>19</sub>O<sub>27</sub> [M-H]<sup>-</sup> 2024.90651, found 2024.90393.

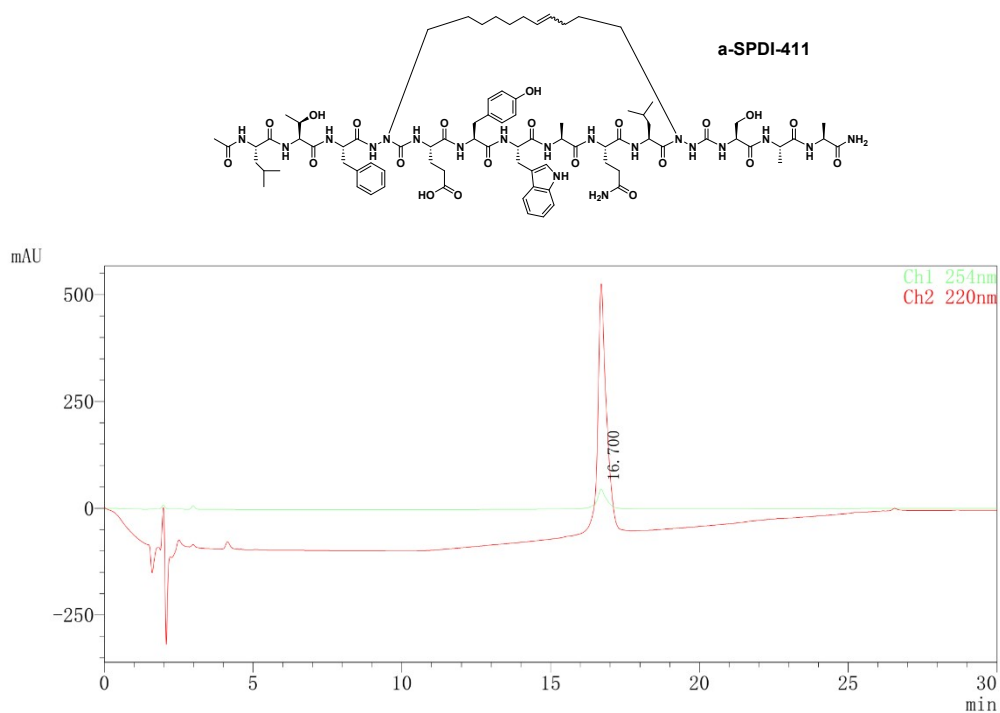

**Figure S5.** HPLC analysis of the aza-stapled peptide **a-SPDI-411** was performed using an isocratic gradient of 75% for 5 min, and then using a linear gradient of 75-95% of MeOH containing 0.1% FA in H<sub>2</sub>O containing 0.1% FA over 15 min, R.T. = 16.700 min; HRMS m/z calcd for C<sub>82</sub>H<sub>119</sub>N<sub>19</sub>Na<sub>2</sub>O<sub>21</sub> [M+2Na]<sup>2+</sup> 875.93062, found 875.93140.

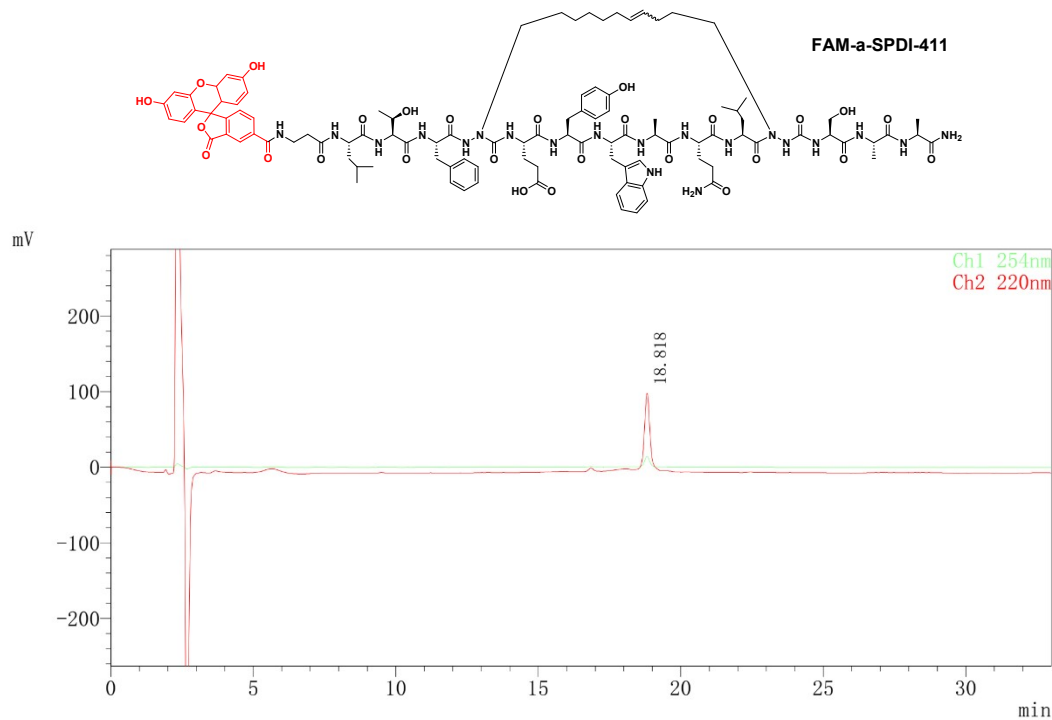

**Figure S6.** HPLC analysis of the aza-stapled peptide **FAM-a-SPDI-411** was performed using a linear gradient of 75-95% of MeOH containing 0.1% FA in H<sub>2</sub>O containing 0.1% FA over 20 min, R.T. = 18.818 min; HRMS m/z calcd for C<sub>104</sub>H<sub>133</sub>N<sub>20</sub>O<sub>27</sub> [M-H]<sup>-</sup> 2023.96435, found 2023.95703.
